# Supplementary material
Source: PubMed Central journal article supplement (PMC11104005)
Supplement: NIHMS1988644-supplement-Supplementary_e-Tables_1-6.pdf [file NIHMS1988644-supplement-Supplementary_e-Tables_1-6.pdf]

ONLINE ONLY

## Supplemental material

**Microsurgical clipping and endovascular management of unruptured anterior circulation aneurysms: how age, frailty, and comorbidity indexes influence outcomes**

Kandregula et al.

<https://thejns.org/doi/abs/10.3171/2022.8.JNS22372>

**DISCLAIMER** The *Journal of Neurosurgery* acknowledges that the following section is published verbatim as submitted by the authors and did not go through either the *Journal's* peer-review or editing process.

**Supplementary e-Table 1: Details of ICD-10 diagnostic and procedural codes**

| <b>Diagnosis</b>                                          | <b>ICD-10 codes (diagnostic and procedural)</b>                                                                                                                                                                                                                              |
|-----------------------------------------------------------|------------------------------------------------------------------------------------------------------------------------------------------------------------------------------------------------------------------------------------------------------------------------------|
| Cerebral Unruptured aneurysm                              | I67.1                                                                                                                                                                                                                                                                        |
| Endovascular management                                   | '03VG3CZ','03VG3HZ','03VG3DZ','03VK3BZ','03VK3DZ','03VL3BZ','03VL3DZ','03VL3HZ','03LG3BZ','03LG3DZ','03LK3BZ','03LK3DZ','03LL3BZ','03LL3DZ','03VP3DZ','03VP3HZ','03VK4BZ','03VP4DZ','03P4HZ','03VQ3BZ','03VQ3DZ','03VQ3HZ','03VQ3ZZ','03VQ4BZ','03VQ4DZ','03VQ4HZ','03VQ4ZZ' |
| Open surgical clipping of aneurysm (anterior circulation) | 03VG0CZ, 03VL0CZ, 03VK0CZ,03LK0CZ,03LGC0CZ,03LLOCZ                                                                                                                                                                                                                           |
| Wound complications, including CSF leak                   | T81.3,T81.30,T81.30XA,T81.30XD,T81.30XS,T81.31,T81.31XA,T81.31XD,T81.31XS,T81.32,T81.32XA,T81.32XD,T81.32XS, G97.0                                                                                                                                                           |
| Respiratory complications                                 | J81.0,J80,J96.00,J96.90,J96.91,J96.92,J96.01,J96.02,J95.89,J95.859,T8.182XA,J18,J18.0,J18.1,J18.2,J18.8,J18.9                                                                                                                                                                |
| Acute Kidney Injury                                       | N17.0,N17.1,N17.2,N17.8,N17.9                                                                                                                                                                                                                                                |
| UTI                                                       | N39.0                                                                                                                                                                                                                                                                        |
| Cardiac complications                                     | I97.710, I97.790, I97.88, I97.89,I97.111,I97.121, I97.131,I97.191                                                                                                                                                                                                            |
| Neurological complications                                | 'G9751','G9761','E3601','E3612', G40                                                                                                                                                                                                                                         |
| Sepsis and septic shock                                   | A410,A4101,A4102,A411,A412,A413,A414,A415,A4150,A4151,A4152,A4153,A4159,A418,A4181,A4189,A419, T81.12, T81.12XA, T81.12XD, T81.12XS                                                                                                                                          |
| Ventilation                                               | 5A1935Z, 5A1945Z, 5A1955Z                                                                                                                                                                                                                                                    |
| DVT                                                       | I82.2 (X)                                                                                                                                                                                                                                                                    |

**Supplementary e-Table 2: Variables used for extraction of the Hospital Frailty Risk Score (HFRS)**

| <b>ICD_Code</b> | <b>ICD_Description</b>                                                                              | <b>Deficit_Category</b>         | <b>Points</b> |
|-----------------|-----------------------------------------------------------------------------------------------------|---------------------------------|---------------|
| <b>F00</b>      | Dementia in Alzheimer's disease                                                                     | Memory & cognitive problems     | 7.1           |
| <b>G81</b>      | Hemiplegia                                                                                          | Cerebrovascular disease         | 4.4           |
| <b>G30</b>      | Alzheimer's disease                                                                                 | Memory & cognitive problems     | 4             |
| <b>I69</b>      | Sequelae of cerebrovascular disease (secondary codes)                                               | Cerebrovascular disease         | 3.7           |
| <b>R29</b>      | Other symptoms and signs involving the nervous and musculoskeletal systems (R29.6 Tendency to fall) | Falls                           | 3.6           |
| <b>N39</b>      | Other disorders of urinary system (includes urinary tract infection and urinary incontinence)       | Urinary system                  | 3.2           |
| <b>W19</b>      | Unspecified fall                                                                                    | Falls                           | 3.2           |
| <b>S00</b>      | Superficial injury of head                                                                          | Falls                           | 3.2           |
| <b>F05</b>      | Delirium, not induced by alcohol and other psychoactive substances                                  | Memory & cognitive problems     | 3.2           |
| <b>R31</b>      | Unspecified haematuria                                                                              | Urinary system                  | 3             |
| <b>B96</b>      | Other bacterial agents as the cause of diseases classified to other chapters (secondary code)       | Acute Infection                 | 2.9           |
| <b>R41</b>      | Other symptoms and signs involving cognitive functions and awareness                                | Memory & cognitive problems     | 2.7           |
| <b>R26</b>      | Abnormalities of gait and mobility                                                                  | Mobility and transfer problems  | 2.6           |
| <b>R56</b>      | Convulsions, not elsewhere classified                                                               | Acute neurological              | 2.6           |
| <b>I67</b>      | Other cerebrovascular diseases                                                                      | Cerebrovascular disease         | 2.6           |
| <b>R40</b>      | Somnolence, stupor and coma                                                                         | Acute neurological              | 2.5           |
| <b>T83</b>      | Complications of genitourinary prosthetic devices, implants and grafts                              | Urinary system                  | 2.4           |
| <b>S06</b>      | Intracranial injury                                                                                 | Cerebrovascular disease         | 2.4           |
| <b>E86</b>      | Volume depletion                                                                                    | Acute kidney injury/Dehydration | 2.3           |

|            |                                                                                        |                                               |     |
|------------|----------------------------------------------------------------------------------------|-----------------------------------------------|-----|
| <b>E87</b> | Other disorders of fluid, electrolyte and acid-base balance                            | Electrolytes and Metabolic disorders          | 2.3 |
| <b>S42</b> | Fracture of shoulder and upper arm                                                     | Fragility Fractures                           | 2.3 |
| <b>M25</b> | Other joint disorders, not elsewhere classified                                        | Arthritis                                     | 2.3 |
| <b>R54</b> | Senility                                                                               | Memory & cognitive problems                   | 2.2 |
| <b>F03</b> | Unspecified dementia                                                                   | Memory & cognitive problems                   | 2.1 |
| <b>Z50</b> | Care involving use of rehabilitation procedures                                        | Mobility and transfer problems                | 2.1 |
| <b>W18</b> | Other fall on same level                                                               | Falls                                         | 2.1 |
| <b>S80</b> | Superficial injury of lower leg                                                        | Falls                                         | 2   |
| <b>L03</b> | Cellulitis                                                                             | Acute Infection                               | 2   |
| <b>Z75</b> | Problems related to medical facilities and other health care                           | Social vulnerability                          | 2   |
| <b>F01</b> | Vascular dementia                                                                      | Memory & cognitive problems                   | 2   |
| <b>H54</b> | Blindness and low vision                                                               | Sensory loss                                  | 1.9 |
| <b>E53</b> | Deficiency of other B group vitamins                                                   | Anaemia & haematinic deficiency               | 1.9 |
| <b>R55</b> | Syncope and collapse                                                                   | Hypotension / syncope                         | 1.8 |
| <b>K59</b> | Other functional intestinal disorders                                                  | Digestive tract functional disorders          | 1.8 |
| <b>S22</b> | Fracture of rib(s), sternum and thoracic spine                                         | Fragility Fractures                           | 1.8 |
| <b>N17</b> | Acute renal failure                                                                    | Acute kidney injury/Dehydration               | 1.8 |
| <b>Z60</b> | Problems related to social environment                                                 | Social vulnerability                          | 1.8 |
| <b>G20</b> | Parkinson's disease                                                                    | Parkinsonism & tremor                         | 1.8 |
| <b>B95</b> | Streptococcus and staphylococcus as the cause of diseases classified to other chapters | Acute Infection                               | 1.7 |
| <b>L89</b> | Decubitus ulcer                                                                        | Skin ulcer/pressure sore                      | 1.7 |
| <b>Z22</b> | Carrier of infectious disease                                                          | Hospital acquired complications or infections | 1.7 |

|            |                                                                       |                                               |     |
|------------|-----------------------------------------------------------------------|-----------------------------------------------|-----|
| <b>R44</b> | Other symptoms and signs involving general sensations and perceptions | Sensory loss                                  | 1.6 |
| <b>K26</b> | Duodenal ulcer                                                        | Peptic ulcer                                  | 1.6 |
| <b>I95</b> | Hypotension                                                           | Hypotension / syncope                         | 1.6 |
| <b>N19</b> | Unspecified renal failure                                             | Chronic kidney disease                        | 1.6 |
| <b>L97</b> | Ulcer of lower limb, not elsewhere classified                         | Skin ulcer/pressure sore                      | 1.6 |
| <b>A41</b> | Other septicaemia                                                     | Acute Infection                               | 1.6 |
| <b>X59</b> | Exposure to unspecified factor                                        | Other trauma (excl. fragility fractures)      | 1.5 |
| <b>J96</b> | Respiratory failure, not elsewhere classified                         | Respiratory disease                           | 1.5 |
| <b>G40</b> | Epilepsy                                                              | Acute neurological                            | 1.5 |
| <b>Z87</b> | Personal history of other diseases and conditions                     | Social vulnerability                          | 1.5 |
| <b>M19</b> | Other arthrosis                                                       | Arthritis                                     | 1.5 |
| <b>S72</b> | Fracture of femur                                                     | Fragility Fractures                           | 1.4 |
| <b>E16</b> | Other disorders of pancreatic internal secretion                      | Electrolytes and Metabolic disorders          | 1.4 |
| <b>R94</b> | Abnormal results of function studies                                  | Electrolytes and Metabolic disorders          | 1.4 |
| <b>M81</b> | Osteoporosis without pathological fracture                            | Osteoporosis                                  | 1.4 |
| <b>S32</b> | Fracture of lumbar spine and pelvis                                   | Fragility Fractures                           | 1.4 |
| <b>N18</b> | Chronic renal failure                                                 | Chronic kidney disease                        | 1.4 |
| <b>R33</b> | Retention of urine                                                    | Urinary system                                | 1.3 |
| <b>R69</b> | Unknown and unspecified causes of morbidity                           | Uncertain diagnosis/Generally unwell          | 1.3 |
| <b>N28</b> | Other disorders of kidney and ureter, not elsewhere classified        | Chronic kidney disease                        | 1.3 |
| <b>G45</b> | Transient cerebral ischaemic attacks and related syndromes            | Cerebrovascular disease                       | 1.2 |
| <b>R45</b> | Symptoms and signs involving emotional state                          | Depression and mood disorders                 | 1.2 |
| <b>R32</b> | Unspecified urinary incontinence                                      | Urinary system                                | 1.2 |
| <b>Y95</b> | Nosocomial condition                                                  | Hospital acquired complications or infections | 1.2 |

|            |                                                                             |                                               |     |
|------------|-----------------------------------------------------------------------------|-----------------------------------------------|-----|
| <b>S09</b> | Other and unspecified injuries of head                                      | Falls                                         | 1.2 |
| <b>G31</b> | Other degenerative diseases of nervous system, not elsewhere classified     | Memory & cognitive problems                   | 1.2 |
| <b>M79</b> | Other soft tissue disorders, not elsewhere classified                       | Skin ulcer/pressure sore                      | 1.1 |
| <b>A04</b> | Other bacterial intestinal infections                                       | Acute Infection                               | 1.1 |
| <b>A09</b> | Diarrhoea and gastroenteritis of presumed infectious origin                 | Acute Infection                               | 1.1 |
| <b>J18</b> | Pneumonia, organism unspecified                                             | Acute Infection                               | 1.1 |
| <b>W06</b> | Fall involving bed                                                          | Falls                                         | 1.1 |
| <b>S01</b> | Open wound of head                                                          | Falls                                         | 1.1 |
| <b>Z74</b> | Problems related to care-provider dependency                                | Social vulnerability                          | 1.1 |
| <b>R02</b> | Gangrene, not elsewhere classified                                          | Acute Infection                               | 1   |
| <b>E55</b> | Vitamin D deficiency                                                        | Osteoporosis                                  | 1   |
| <b>J69</b> | Pneumonitis due to solids and liquids                                       | Swallowing problems                           | 1   |
| <b>Z93</b> | Artificial opening status                                                   | Digestive tract functional disorders          | 1   |
| <b>R47</b> | Speech disturbances, not elsewhere classified                               | Sensory loss                                  | 1   |
| <b>H91</b> | Other hearing loss                                                          | Sensory loss                                  | 0.9 |
| <b>M41</b> | Scoliosis                                                                   | Arthritis                                     | 0.9 |
| <b>R63</b> | Symptoms and signs concerning food and fluid intake                         | Uncertain diagnosis/Generally unwell          | 0.9 |
| <b>W10</b> | Fall on and from stairs and steps                                           | Falls                                         | 0.9 |
| <b>W01</b> | Fall on same level from slipping, tripping and stumbling                    | Falls                                         | 0.9 |
| <b>E05</b> | Thyrotoxicosis [hyperthyroidism]                                            | Electrolytes and Metabolic disorders          | 0.9 |
| <b>U80</b> | Agent resistant to penicillin and related antibiotics (secondary code only) | Hospital acquired complications or infections | 0.8 |
| <b>M80</b> | Osteoporosis with pathological fracture                                     | Fragility Fractures                           | 0.8 |
| <b>Z99</b> | Dependence on enabling machines and devices, not elsewhere classified       | Social vulnerability                          | 0.8 |

|            |                                                                                                                                                                   |                                               |     |
|------------|-------------------------------------------------------------------------------------------------------------------------------------------------------------------|-----------------------------------------------|-----|
| <b>I63</b> | Cerebral Infarction                                                                                                                                               | Cerebrovascular disease                       | 0.8 |
| <b>R13</b> | Dysphagia                                                                                                                                                         | Swallowing problems                           | 0.8 |
| <b>K92</b> | Other diseases of digestive system                                                                                                                                | Digestive tract functional disorders          | 0.8 |
| <b>R00</b> | Abnormalities of heart beat                                                                                                                                       | Atrial fibrillation                           | 0.7 |
| <b>F10</b> | Mental and behavioural disorders due to use of alcohol                                                                                                            | Mental health/Mood                            | 0.7 |
| <b>Y84</b> | Other medical procedures as the cause of abnormal reaction of the patient, or of later complication, without mention of misadventure at the time of the procedure | Hospital acquired complications or infections | 0.7 |
| <b>J22</b> | Unspecified acute lower respiratory infection                                                                                                                     | Acute Infection                               | 0.7 |
| <b>N20</b> | Calculus of kidney and ureter                                                                                                                                     | Urinary system                                | 0.7 |
| <b>R79</b> | Other abnormal findings of blood chemistry                                                                                                                        | Electrolytes and Metabolic disorders          | 0.6 |
| <b>Z73</b> | Problems related to life-management difficulty                                                                                                                    | Social vulnerability                          | 0.6 |
| <b>F32</b> | Depressive episode                                                                                                                                                | Depression and mood disorders                 | 0.5 |
| <b>Z91</b> | Personal history of risk-factors, not elsewhere classified                                                                                                        | Social vulnerability                          | 0.5 |
| <b>M48</b> | Spinal stenosis (secondary code only)                                                                                                                             | Arthritis                                     | 0.5 |
| <b>S51</b> | Open wound of forearm                                                                                                                                             | Other trauma (excl. fragility fractures)      | 0.5 |
| <b>E83</b> | Disorders of mineral metabolism                                                                                                                                   | Electrolytes and Metabolic disorders          | 0.4 |
| <b>M15</b> | Polyarthrosis                                                                                                                                                     | Arthritis                                     | 0.4 |
| <b>D64</b> | Other anaemias                                                                                                                                                    | Anaemia & haematinic deficiency               | 0.4 |
| <b>L08</b> | Other local infections of skin and subcutaneous tissue                                                                                                            | Acute Infection                               | 0.4 |
| <b>R11</b> | Nausea and vomiting                                                                                                                                               | Digestive tract functional disorders          | 0.3 |
| <b>K52</b> | Other noninfective gastroenteritis and colitis                                                                                                                    | Digestive tract functional disorders          | 0.3 |
| <b>R50</b> | 3.6                                                                                                                                                               | Uncertain diagnosis/Generally unwell          | 0.1 |

Reproduced from Gilbert T, Neuburger J, Kraindler J, Keeble E, Smith P, Ariti C, Arora S, Street A, Parker S, Roberts HC, Bardsley M, Conroy S. Development and validation of a

Hospital Frailty Risk Score focusing on older people in acute care settings using electronic hospital records: an observational study. *Lancet*. 2018;391:1775-1782. © The authors, published with permission. CC BY 4.0 (<https://creativecommons.org/licenses/by/4.0/>).



**Supplementary e-Table 3: Variables for extraction of the Neurovascular Comorbidity Index and Elixhauser Comorbidity Index**

**Neurovascular Comorbidity Index**

| <b>Diagnosis (ICD-10)</b> | <b>Points given for each disorder</b> |
|---------------------------|---------------------------------------|
| Neurological disorder     | 7                                     |
| Renal insufficiency       | 6                                     |
| GI bleeding               | 6                                     |
| Paralysis                 | 5                                     |
| Acute MI                  | 5                                     |
| Electrolyte disorder      | 4                                     |
| Weight loss               | 4                                     |
| Metastatic cancer         | 4                                     |
| Drug abuse                | 3                                     |
| Arrhythmia                | 2                                     |
| Coagulopathy              | 2                                     |
| CVA                       | 2                                     |
| Psychosis                 | 2                                     |
| Alcoholism                | 1                                     |
| Perivascular disease      | 1                                     |
| Valvular disease          | 1                                     |
| No comorbidities          | 0                                     |
| Tobacco use               | -1                                    |
| Hypothyroidism            | -1                                    |
| Depression                | -1                                    |
| Hypercholesterolemia      | -2                                    |

Reproduced from Newman WC, Neal DW, Hoh BL. A new comorbidities index for risk stratification for treatment of unruptured cerebral aneurysms. *J Neurosurg.* 2016;125(3):713-719. © AANS, published with permission.

**Elixhauser Comorbidity Index**

| <b>Comorbidity</b>               | <b>Weight assigned</b> |
|----------------------------------|------------------------|
| <b>Neurological disorder</b>     | <b>6</b>               |
| <b>Renal insufficiency</b>       | <b>5</b>               |
| <b>Gastrointestinal bleeding</b> | <b>-</b>               |
| <b>Paralysis</b>                 | <b>7</b>               |
| <b>Acute MI</b>                  | <b>-</b>               |
| <b>Electrolyte disorder</b>      | <b>5</b>               |
| <b>Weight loss</b>               | <b>6</b>               |
| <b>Metastatic cancer</b>         | <b>12</b>              |
| <b>Drug abuse</b>                | <b>-7</b>              |
| <b>Arrhythmia</b>                | <b>5</b>               |
| <b>Coagulopathy</b>              | <b>3</b>               |

|                                         |           |
|-----------------------------------------|-----------|
| <b>CVA</b>                              | -         |
| <b>Psychosis</b>                        | <b>0</b>  |
| <b>Alcoholism</b>                       | <b>0</b>  |
| <b>Perivascular disease</b>             | <b>2</b>  |
| <b>Valvular disease</b>                 | <b>-1</b> |
| <b>Tobacco use</b>                      | -         |
| <b>Hypothyroidism</b>                   | <b>0</b>  |
| <b>Depression</b>                       | -         |
| <b>Hypercholesterolemia</b>             | -         |
| <b>Congestive heart failure</b>         | <b>7</b>  |
| <b>Dementia</b>                         | -         |
| <b>Chronic pulmonary disease</b>        | <b>3</b>  |
| <b>Connective tissue disorder</b>       | <b>0</b>  |
| <b>Ulcer disease</b>                    | -         |
| <b>Mild liver disease</b>               | <b>11</b> |
| <b>Diabetes</b>                         | <b>0</b>  |
| <b>Diabetes with end organ damage</b>   | <b>0</b>  |
| <b>Any solid tumor</b>                  | <b>4</b>  |
| <b>Leukemia/Lymphoma</b>                | <b>9</b>  |
| <b>Moderate or severe liver disease</b> | <b>11</b> |
| <b>AIDS</b>                             | <b>0</b>  |
| <b>Pulmonary circulation disorders</b>  | <b>4</b>  |
| <b>Hypertension</b>                     | <b>0</b>  |
| <b>Obesity</b>                          | <b>-4</b> |
| <b>Anemia</b>                           | <b>-2</b> |

HCUP Elixhauser Comorbidity Software. Healthcare Cost and Utilization Project (HCUP). June 2107. Agency for Healthcare Research and Quality, Rockville, MD. <https://www.hcup-us.ahrq.gov/toolssoftware/comorbidity/comorbidity.jsp>. Complete SAS code for extraction of the Elixhauser Index available for free at the above-mentioned link.

See also Elixhauser A, Steiner C, Harris R, Coffey RM. Comorbidity measures for use with administrative data. *Med Care*. 1998;36(1):8-27; and Moore BJ, White S, Washington R, Coenen N, Elixhauser A. Identifying increased risk of readmission and in-hospital mortality using hospital administrative data: The AHRQ Elixhauser Comorbidity Index. *Med Care*. 2017;55(7):698-705.

**Supplementary e-Table 4: Odds ratios computed using binary logistic regression analysis for clipping aneurysms after adjusting for potential confounders**

| Variables                              | Death in Hospital   |             | Extended length of stay |                  | Poor outcome        |                  | Any complication    |                  |
|----------------------------------------|---------------------|-------------|-------------------------|------------------|---------------------|------------------|---------------------|------------------|
|                                        | OR (95% CI)         | p-value     | OR (95% CI)             | p-value          | OR (95% CI)         | p-value          | OR (95% CI)         | p-value          |
| <b>Age</b>                             | 1.204 (1.031-1.406) | <b>0.01</b> | 0.991(0.973-1.009)      | 0.324            | 1.035(1.017-1.052)  | <b>&lt;0.001</b> | 1.004(0.972-1.037)  | 0.817            |
| <b>Gender</b>                          | 0.240 (0.032-1.815) | 0.167       | 0.96 (0.669-1.377)      | 0.823            | 1.310(0.944-1.818)  | 0.107            | 0.632(0.352-1.137)  | 0.126            |
| <b>Elixhauser comorbidity score</b>    | 1.184 (0.982-1.428) | 0.076       | 1.059 (1.023-1.096)     | <b>0.001</b>     | 1.041 (1.008-1.074) | <b>0.01</b>      | 1.082(1.026-1.142)  | <b>0.04</b>      |
| <b>Neurovascular comorbidity index</b> | 1.255(0.998-1.579)  | 0.156       | 1.105 (1.060-1.152)     | <b>&lt;0.001</b> | 1.067(1.026-1.109)  | <b>0.001</b>     | 0.981 (0.921-1.045) | 0.547            |
| <b>Hospital Frailty Risk score</b>     | 0.720(0.501-1.034)  | 0.075       | 1.185(1.113-1.261)      | <b>&lt;0.001</b> | 1.171(1.102-1.244)  | <b>&lt;0.001</b> | 1.313(1.208-1.426)  | <b>&lt;0.001</b> |

**Supplementary e-Table 5: Odds ratios computed for outcomes using binary logistic regression analysis for coiling aneurysms after adjusting for potential confounders**

| Variables                              | Death in Hospital   |                  | Extended length of stay |                  | Poor outcome          |                  | Any complication    |                  |
|----------------------------------------|---------------------|------------------|-------------------------|------------------|-----------------------|------------------|---------------------|------------------|
|                                        | OR (95% CI)         | p-value          | OR (95% CI)             | p-value          | OR (95% CI)           | p-value          | OR (95% CI)         | p-value          |
| <b>Age</b>                             | 1.006(0.988-1.023)  | 0.526            | 1.001(0.998-1.004)      | 0.674            | 1.030 (1.026 - 1.035) | <b>&lt;0.001</b> | 1.009(1.002-1.016)  | <b>0.012</b>     |
| <b>Gender</b>                          | 2.171 (1.342-3.511) | <b>0.002</b>     | 1.125 (1.045 - 1.210)   | 0.002            | 1.166(1.055-1.288)    | 0.107            | 1.079 (0.923-1.262) | 0.338            |
| <b>Elixhauser comorbidity score</b>    | 1.173(1.142-1.204)  | <b>&lt;0.001</b> | 1.072(1.064-1.079)      | <b>&lt;0.001</b> | 1.065(1.05-1.074)     | <b>0.01</b>      | 1.046 (1.032-1.059) | <b>&lt;0.001</b> |
| <b>Neurovascular comorbidity index</b> | 1.050 (1.011-1.089) | <b>0.01</b>      | 1.083(1.072-1.093)      | <b>&lt;0.001</b> | 1.069 (1.057 - 1.081) | <b>0.001</b>     | 1.046 (1.030-1.063) | <b>&lt;0.001</b> |
| <b>Hospital Frailty Risk score</b>     | 1.041 (0.994-1.091) | 0.086            | 1.229(1.212-1.247)      | <b>&lt;0.001</b> | 1.247 (1.227 - 1.267) | <b>&lt;0.001</b> | 1.384 (1.355-1.414) | <b>&lt;0.001</b> |

**Supplementary e-Table 6: Literature review of the various indexes along with online resources**

| Frailty Index                          | Description                                                                                                                                                                                                                                        | URL                                                                                                                                          |
|----------------------------------------|----------------------------------------------------------------------------------------------------------------------------------------------------------------------------------------------------------------------------------------------------|----------------------------------------------------------------------------------------------------------------------------------------------|
| Rockwood Frailty scale                 | <p>Comprehensive geriatric assessment</p> <p>Dalhousie University,<br/>Halifax, Nova Scotia,<br/>Canada</p>                                                                                                                                        | <p><a href="https://www.cgakit.com/fr-1-rockwood-clinical-frailty-scale">https://www.cgakit.com/fr-1-rockwood-clinical-frailty-scale</a></p> |
| Fried Frailty index                    | <p>Unintentional weight loss<br/>Grip strength in lower quartile<br/>Self-reported exhaustion<br/>Slowness of the gait<br/>Low physical activity</p>                                                                                               | NA                                                                                                                                           |
| Frailty Group Calculator               | <p>The Frailty score (1-20) is calculated by multiplication of the weighted scores for the following four geriatric assessment variables: age, Charlson comorbidity index, Geriatric Nutritional Risk Index.</p> <p>University of Oslo, Norway</p> | <p><a href="https://wide.shinyapps.io/app-frailty/">https://wide.shinyapps.io/app-frailty/</a></p>                                           |
| Johns Hopkins adjusted clinical groups | <p>Johns Hopkins University</p> <p>A single score is generated which classifies categorically as Frail vs Non frail</p>                                                                                                                            | <p><a href="https://www.johnshopkinsolutions.com/solution/frailty/">https://www.johnshopkinsolutions.com/solution/frailty/</a></p>           |
| Modified Frailty Index (mFI-11)        | <p>This index was modelled by the variables in the NSQIP containing 11 variables.</p> <p>Diabetes Mellitus,<br/>Congestive Heart Failure,<br/>Hypertension, Stroke,<br/>Functional Status,<br/>Myocardial infraction,<br/>Vascular disease,</p>    | <p><a href="https://www.evidencio.com/models/show/1777">https://www.evidencio.com/models/show/1777</a></p>                                   |

|                                         |                                                                                                                                                                                                                                                                            |                                                                                                                                             |
|-----------------------------------------|----------------------------------------------------------------------------------------------------------------------------------------------------------------------------------------------------------------------------------------------------------------------------|---------------------------------------------------------------------------------------------------------------------------------------------|
|                                         | Neurological deficit, COPD, Pneumonia, Heart, Impaired sensorium<br><br>Evidencio, Netherlands                                                                                                                                                                             |                                                                                                                                             |
| 5 Factor modified frailty Index (mFI-5) | The original 11 factor modified frailty Index was later modified to 5 factors                                                                                                                                                                                              | N/A                                                                                                                                         |
| Edmonton Frailty risk score             | A simple tool consisting of 9 domains:<br>Health status, functional performance, general health status, social support, medication use, nutrition, mood, continence and functional independence.                                                                           | <a href="https://qxmd.com/calculate/calculator_595/edmonton-frail-scale">https://qxmd.com/calculate/calculator_595/edmonton-frail-scale</a> |
| G8 Health Status Screening tool         | The G-8 screening tool was initially used to identify elderly cancer patients by comprehensively geriatric assessment.<br><br>Variables:<br>Food Intake, Weight loss, Mobility, neuropsychological problems, BMI, Drugs, Health Status, Age.<br><br>Evidencio, Netherlands | <a href="https://www.evidencio.com/models/show/1045">https://www.evidencio.com/models/show/1045</a>                                         |
| QFrailty Risk Calculator                | This score was developed through the data across the General practitioners in UK.<br><br>Developed in UK for the intent of predicting outcomes in geriatric patients.<br><br>ClinRisk Ltd., UK                                                                             | <a href="https://qfrailty.org/">https://qfrailty.org/</a>                                                                                   |
| Frailty Risk Calculator                 | This risk score evaluates the probability of mortality or being hospitalized within the next one year.                                                                                                                                                                     | <a href="http://smartdata.cs.unibo.it/frailtycalc/">http://smartdata.cs.unibo.it/frailtycalc/</a>                                           |

|                          |                                                                                                                                                                                                                                                         |                                                                                                                                                                                                  |
|--------------------------|---------------------------------------------------------------------------------------------------------------------------------------------------------------------------------------------------------------------------------------------------------|--------------------------------------------------------------------------------------------------------------------------------------------------------------------------------------------------|
|                          | <p>A logistic regression analysis was used utilizing 12 databases and 27 clinical variables.</p> <p>ALMA MATER STUDIORUM, University of Bologna, Italy.</p>                                                                                             |                                                                                                                                                                                                  |
| Senior Health Calculator | <p>This is an online calculator which utilizes the following domains:</p> <p>Medical history (21 items)<br/> Functional status (22 items)<br/> Performance tests (4 items)<br/> Nutritional status (3 items)</p> <p>Beth Israel Medical center, USA</p> | <p><a href="https://www.bidmc.org/research/research-by-department/medicine/gerontology/calculator">https://www.bidmc.org/research/research-by-department/medicine/gerontology/calculator</a></p> |
| CIRS-G                   | <p>Cumulative illness rating scale – Geriatric (CIRS-G)</p> <p>MD Calc, USA</p>                                                                                                                                                                         | <p><a href="https://www.mdcalc.com/cumulative-illness-rating-scale-geriatric-cirs-g#use-cases">https://www.mdcalc.com/cumulative-illness-rating-scale-geriatric-cirs-g#use-cases</a></p>         |
